# Supplementary material for: Mesoporous carbon sheets embedded with vesicles for enhanced supercapacitor performance
Source: Royal Society of Chemistry journal article supplement (doi:10.1039/c9ta02165e), 2019-01-01
Supplement: c9ta02165e1.pdf [file c9ta02165e1.pdf]

## Supporting Information

### Mesoporous carbon sheets embedded by vesicles for enhanced supercapacitor performance

Juan Du, Aibing Chen\*, Yifeng Yu, Yue Zhang, Haijun Lv, Lei Liu\*

College of Chemical and Pharmaceutical Engineering, Hebei University of Science and  
Technology, 70 Yuhua Road, Shijiazhuang 050018, China.

Corresponding Authors: E-mail: [chen\\_ab@163.com](mailto:chen_ab@163.com); [liulei@hebust.edu.cn](mailto:liulei@hebust.edu.cn)

#### **Experimental Section**

##### **Preparation of CS and CS- $\nu$**

0.1 g above iron(III) nitrate was dispersed by solution of 200 mL of H<sub>2</sub>O and 100 mL EtOH, and 30 mL of 1-alkyl-3-methylimidazolium bromide, ([C<sub>18</sub>Mim]Br) surfactant solution (110 mM, dissolved in a 2:1 mixture of H<sub>2</sub>O and EtOH) was quickly added under vigorous stirring and then add the Resorcinol 0.215 g stirring for 30 min. 2.15 mL of TEOS was added to the reaction mixture and subsequently stirred at ambient temperature overnight. The as-synthesized suspension was centrifuged and dried at 70 °C overnight. For carbonization, the obtained product was heated at 800 °C for 3 h with a heating rate of 2 °C min<sup>-1</sup> under N<sub>2</sub> atmosphere. The CS- $\nu$  were obtained respectively after removing the silica with 10 wt% hydrogen fluoride (HF) solution and Fe by 2M

HCl solution for 24 h, respectively.

In order to investigate the formation of carbon sheet, the [C<sub>18</sub>Mim]Br, TEOS and phenolic resin was used to prepare N-doped mesoporous carbon sheet (denoted as CS) as our previous work.<sup>1</sup> The carbon yield was obtained basing on the amount of resin and the carbon yield of CS and CS-*v* is 32 % and 36 %, respectively.

### **Characterizations**

The morphology and microstructure of sample were investigated by transmission electron microscopy (TEM, JEOL JEM-2100). Atomic force microscope (AFM) was used to tested the thickness of sample. Nitrogen adsorption-desorption isotherms were carried out on a Micromeritics TriStar 3020 instrument at -196 °C. The Brunauer-Emmett-Teller (BET) method was employed to calculate the specific surface area , while the Barrett-Joyner-Halenda (BJH) method was applied to analyze the pore size distribution using the desorption branch of isotherm. The total pore volume was obtained from the amount of N<sub>2</sub> adsorbed at the relative pressure ( $P/P_0=0.97$ ). X-ray photoelectron spectroscopy (XPS) was conducted on a Thermo Scientific ESCALab 250Xi system using an Al-K $\alpha$  radiation under a vacuum of  $3\times 10^{-10}$  mbar. X-ray diffraction (XRD) patterns were achieved using a Rigaku D/MAX-2500. Raman measurements were performed under ambient conditions using a 532 nm (2.33 eV) laser in the backscattering configuration on a Jobin-Yvon HR800 Spectrometer. The composition of C, H and N content in CS-*v* was evaluated using elemental analysis (CHN) on the Flash EA 1112.

### **Electrochemical Measurements**

The working electrode was prepared by coating the viscous slurry (samples, carbon black and polytetrafluoroethylene with the mass ratio of 8:1:1 in ethanol) onto Ni foam current collector. The mass of active material loaded on each working electrode was 4~5 mg after drying at 100 °C for 24 h. Electrochemical measurements were carried out in both three-electrode and two-electrode system using an electrochemical workstation (CHI 760E, Chenhua Instruments, China) with 6 M KOH solution as the electrolyte. For three-electrode system, a Pt wire and Hg/HgO was used as the counter and reference electrodes. For the fabrication of supercapacitor devices, two slices of electrode were immersed in 6 M KOH and were separated by a filtration paper, then tested by the current collector. Electrochemical performances were evaluated by cyclic voltammetry (CV), galvanostatic charge-discharge (GCD) and electrical impedance spectroscopy (EIS) analysis. For the two-electrode system, the specific capacitances ( $C$ ,  $F g^{-1}$ ), energy density ( $E$ ,  $Wh kg^{-1}$ ) and power density ( $P$ ,  $W kg^{-1}$ ) were calculated by the following equations:  $C=4I\Delta t/\Delta Vm$ ,  $E=0.5C(\Delta V)^2$  and  $P=E/\Delta t$ , where  $I$  (A),  $\Delta t$  (s),  $\Delta V$  (V) and  $m$  (g) are GCD current, discharge time, voltage window, and mass of active material, respectively. In three-electrode system, the specific gravimetric capacitance according to the GCD measurements:  $C=I\Delta t/\Delta Vm$ .

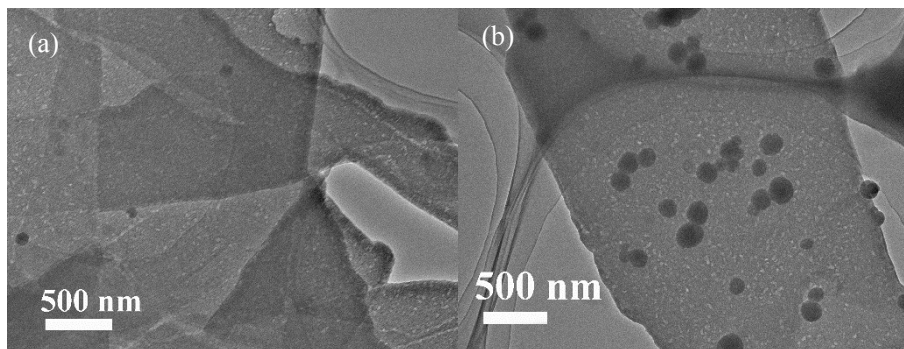

**Fig. S1.** TEM images of hybridization of silica/resin without (a) or with (b) adding of iron(III) nitrate

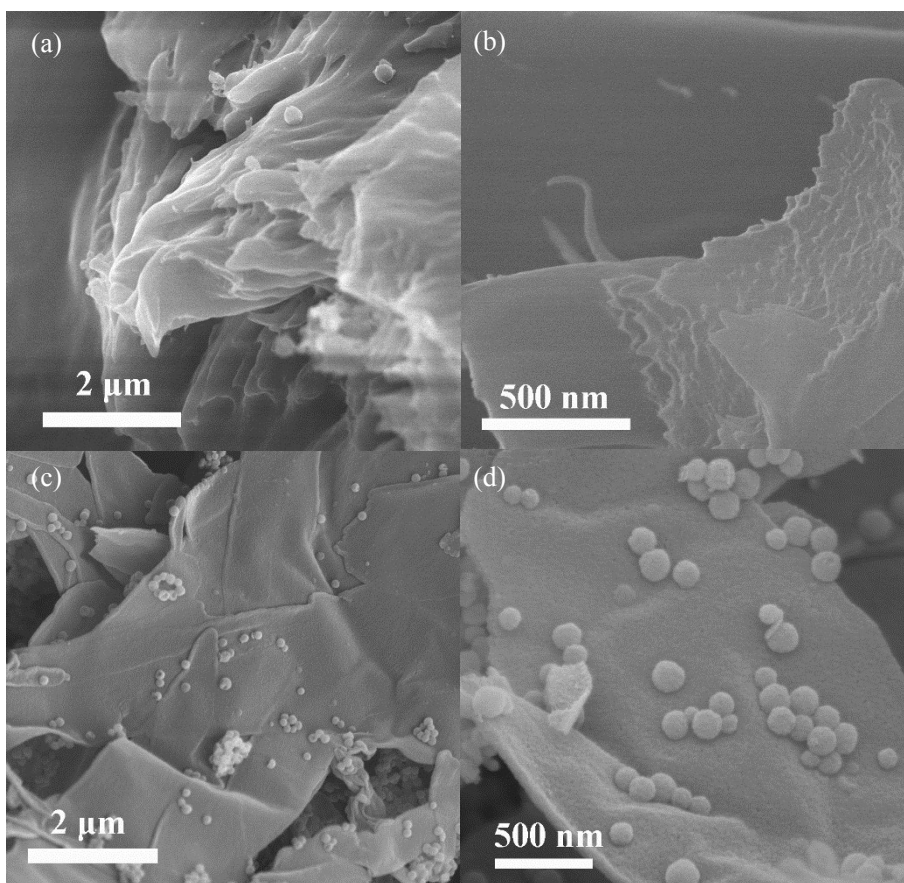

**Fig. S2.** EEM images of CS (a-b) and CS-v (c-d).

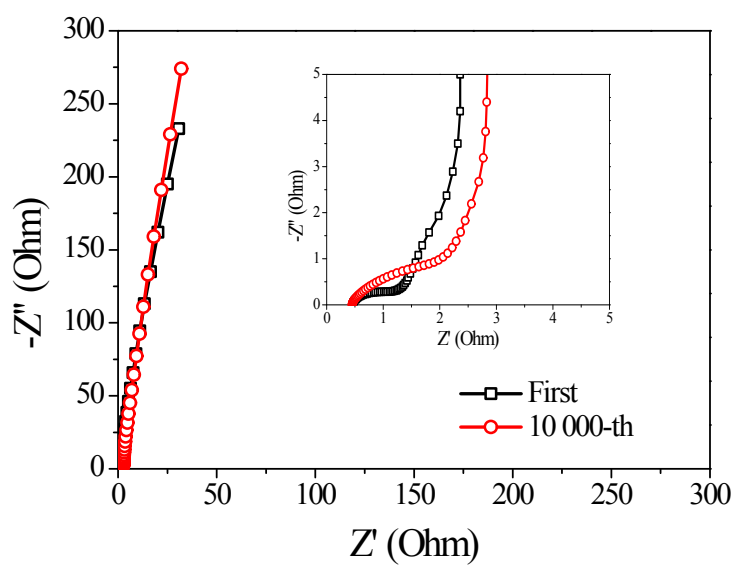

**Figure S3.** Nyquist plots of CS- $\nu$  before and after the cycling test in two-electrode system.

## References

1. J. Du, L. Liu, Y. Yu, Z. Hu, B. Liu and A. Chen, *ACS Appl. Mater. Interfaces*, 2018, **10**, 40062-40069.
